# Supplementary material for: A Dynamical Systems Perspective to Characterize the El Niño Diversity in Spatiotemporal Patterns
Source: Frontiers journal article supplement (doi:10.3389/fphy.2022.919951), 2022-06-16
Supplement: Data_Sheet_1.docx [file Data_Sheet_1.docx]

Supplementary Material

**Text S1 Definition of the spatial correlation between the SATA field at a certain day and its time-lagged ones**.

For a given day (noted as *t*0), the corresponding spatial field of SATA is focused on and read as , in which represents the SATA value of the first grid in this field at time *t*0, and there are totally *N* = 2240 grids in the spatial field in this study. Similarly, for a certain lagged day of *t*0, its time can be noted as *t*0 + *τ* (*τ* denotes the lagged days compared to *t*0, and *τ* is larger than 0), the spatial field of SATA at time *t*0 + *τ* is read as . Then, the Pearson correlation coefficient (noted as *c*()) between and can be calculated as follows:

(S1)

in which “cov” and “std” denotes the computing processes of covariance and standard deviation respectively. Hence, when *τ* is taken as different values, can be used to estimate the spatial correlation between the SATA field at a certain day and its time-lagged ones.

**Figure S1** **(a)** Spatial correlation between the SATA field at a certain day and its time-lagged ones. The black line represents the average result for the group, red for the group. The grey and red shaded areas denote the 90% confidence intervals. **(b)** Same as (a), but for the comparison between the group (black) and the group (blue). **(c)** Same as (a), but for the comparison between the group (red) and the group (blue).


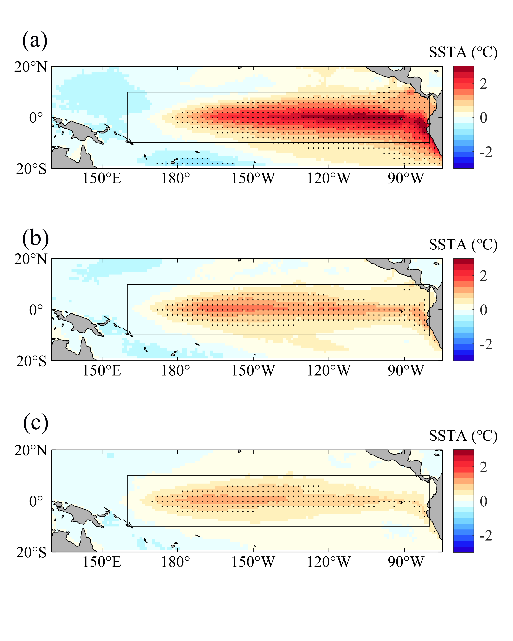


**Figure S2. Comparison of SSTA patterns between high and low dimensions (during El Niño episodes).** **(a)** The composite pattern of SSTA corresponding to the group. **(b)** Same as (a), but for the group. **(c)** Same as (a), but for the group.

**Figure S3. The dynamical evolution of SATA during the 1983 coastal warming event. (a)** The SATA are averaged over 5°S-5°N as a function of time and longitude. **(b)** and **(c)** show the time series of and . The black box lines denote this event, and it is consistent with the ones in Figs. 3a and 4a.
